# Supplementary material for: Quantitative mass spectrometry imaging of small-molecule neurotransmitters in rat brain tissue sections using nanospray desorption electrospray ionization
Source: Royal Society of Chemistry journal article supplement (doi:10.1039/c5an02620b), 2016-01-01
Supplement: c5an02620b1.pdf [file c5an02620b1.pdf]

## **Supplementary Information**

### **Quantitative Mass Spectrometry Imaging of Small-Molecule Neurotransmitters in Rat Brain Tissue Sections using Nanospray Desorption Electrospray Ionization**

Hilde-Marléne Bergman<sup>a</sup>, Erik Lundin<sup>a</sup>, Malin Andersson<sup>b</sup>, Ingela Lanekoff<sup>a\*</sup>

a) Department of Chemistry-BMC, Uppsala University, Uppsala, Sweden

b) Department of Pharmaceutical Biosciences, Uppsala University, Uppsala, Sweden

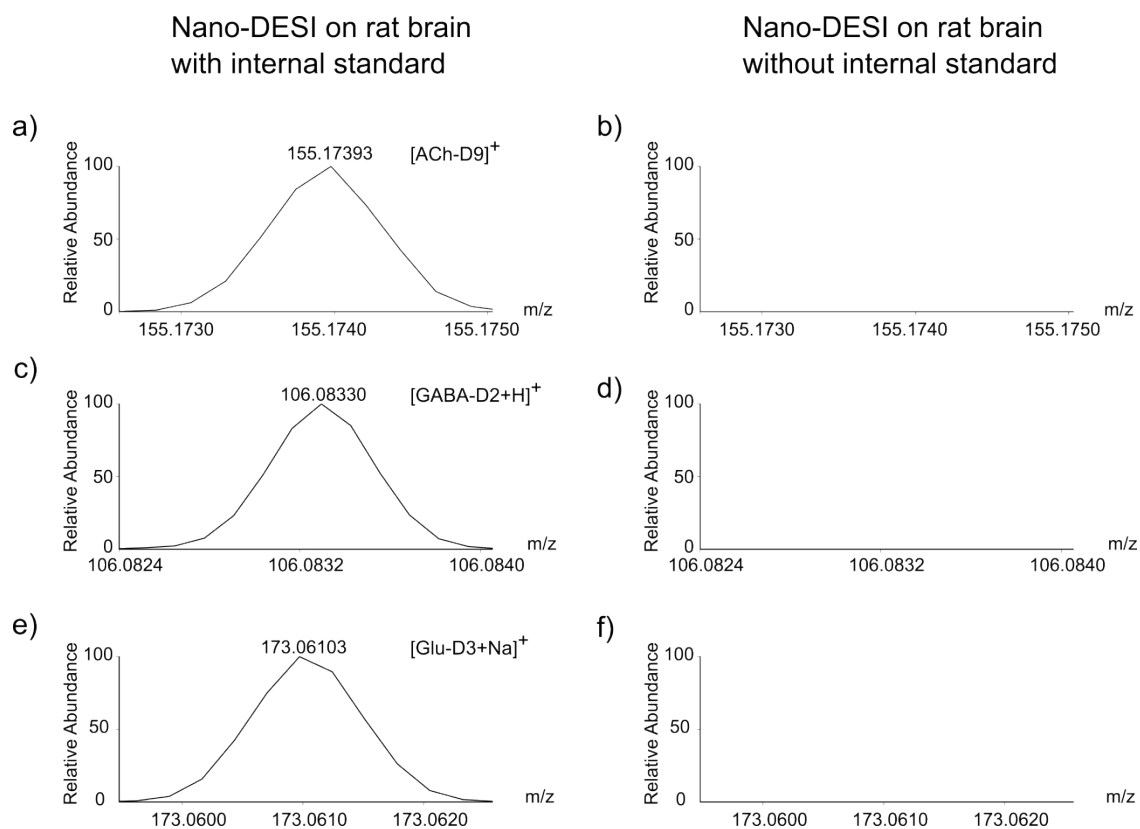

**Fig. S-1** – Averaged mass spectra from rat brain tissue zoomed in at  $m/z$  corresponding to internal standards. The column to the left shows spectra recorded using a nano-DESI solvent with 10 nM ACh-D9, 2  $\mu$ M GABA-D2 and 10  $\mu$ M Glu-D3 in 80% MeOH on rat brain tissue. The column to the right shows spectra recorded using a nano-DESI solvent consisting of 90% MeOH on rat brain tissue. A minimum of 20 spectra were averaged a) Detection of  $[ACh-D9]^+$ , b)  $m/z$  corresponding to  $[ACh-D9]^+$ , c) detection of  $[GABA-D2+H]^+$ , d)  $m/z$  corresponding to  $[GABA-D2+H]^+$ , e) detection of  $[Glu-D3+Na]^+$ , f)  $m/z$  corresponding to  $[Glu-D3+Na]^+$

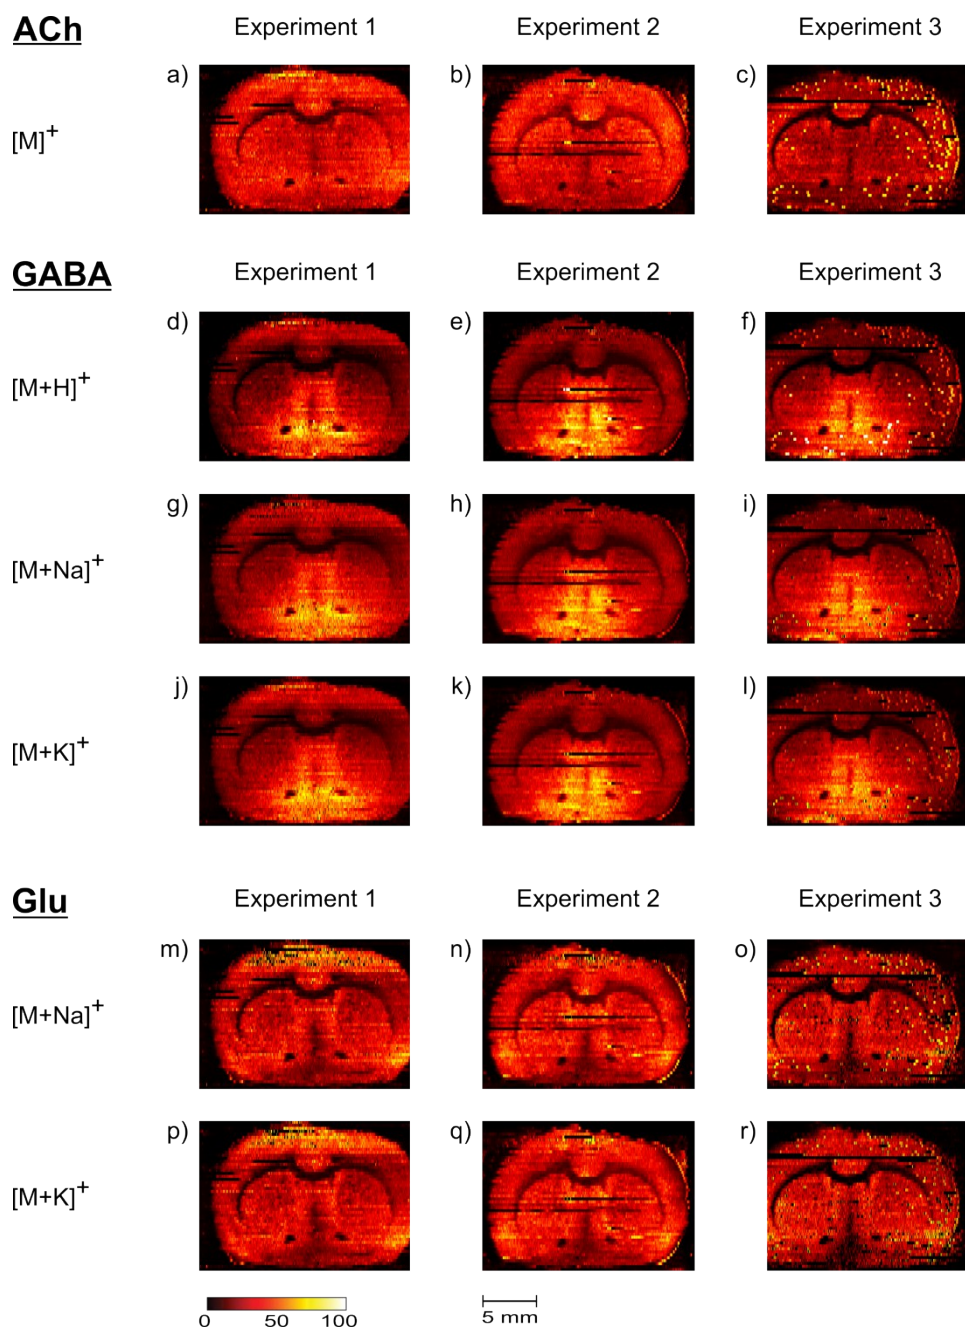

**Fig. S-2** – Normalized ion images of Acetylcholine (ACh),  $\gamma$ -aminobutyric acid (GABA) and glutamate (Glu) in rat brain tissue sections from three nano-DESI MSI experiments. Column 1 shows ion images from experiment 1, column 2 shows ion images from experiment 2, and column 3 shows ion images from experiment 3. a-c)  $[ACh]^+$ , d-f)  $[GABA+H]^+$ , g-i)  $[GABA+Na]^+$ , j-l)  $[GABA+K]^+$ , m-o)  $[Glu+Na]^+$ , p-r)  $[Glu+K]^+$ . Scale bar: 5 mm. The signal intensity of the ion images scale from dark to bright.

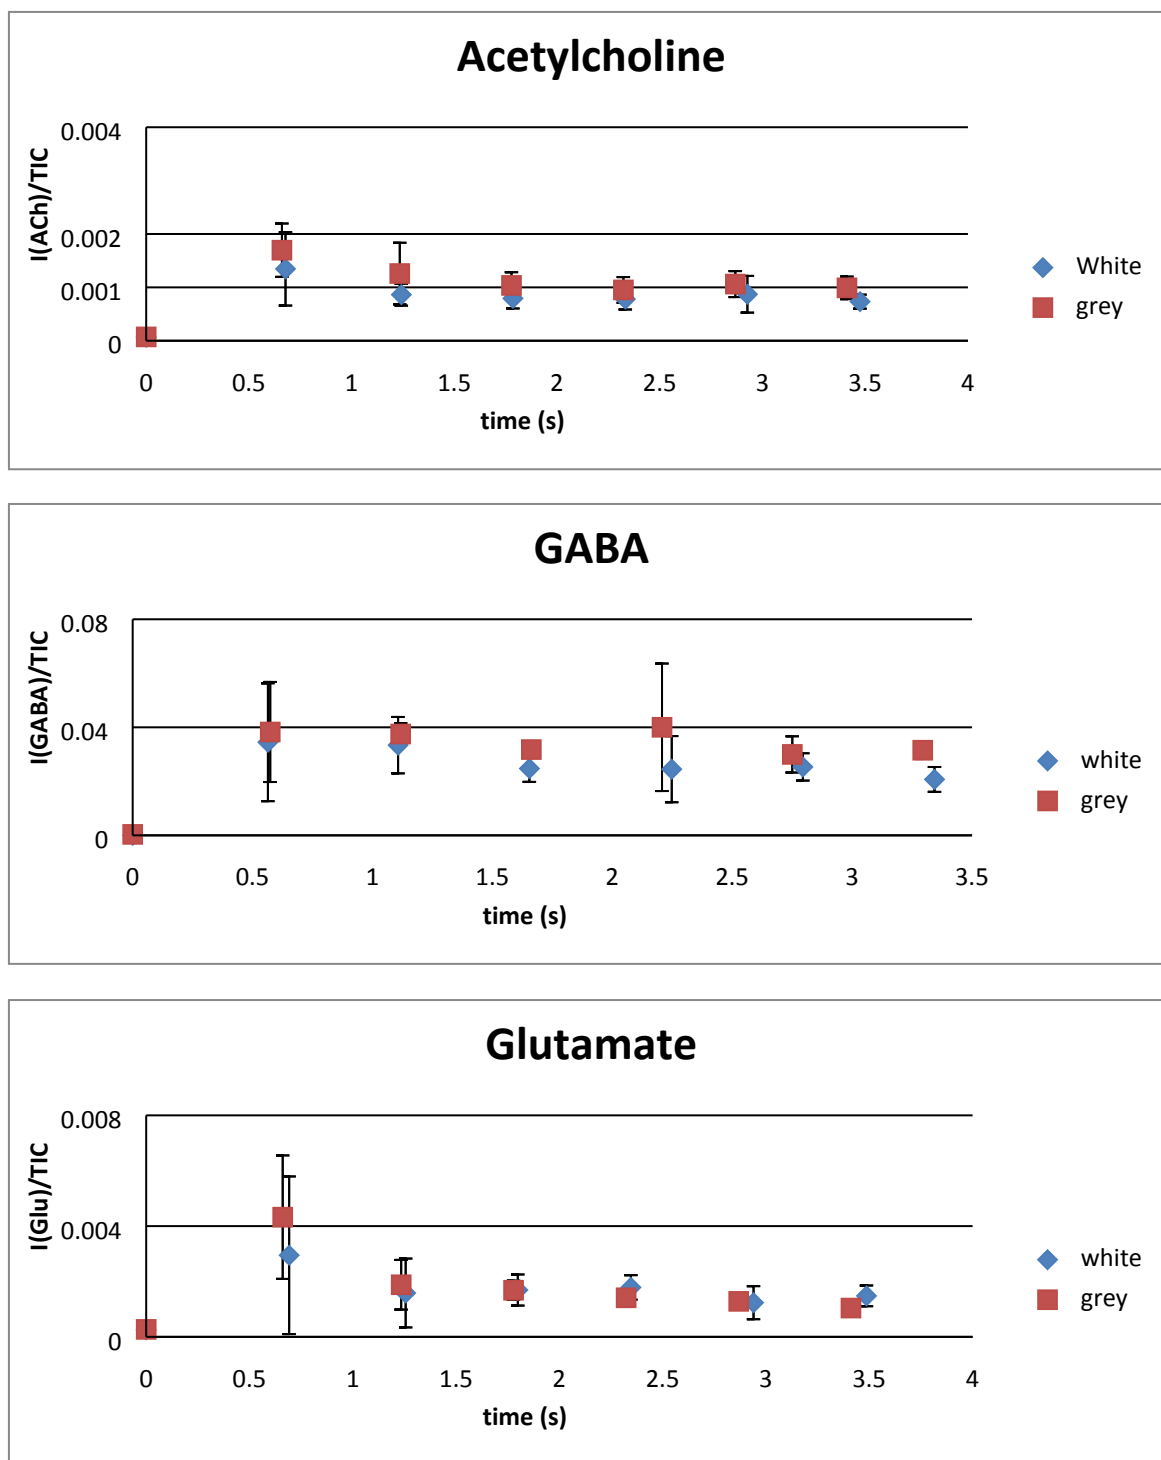

**Fig. S-3** – Localized extraction of acetylcholine ( $[\text{ACh}+\text{H}]^+$ ),  $\gamma$ -aminobutyric acid ( $[\text{GABA}+\text{H}]^+$ ) and glutamate ( $[\text{Glu}+\text{Na}]^+$ ) from white matter (blue diamonds) and grey matter (red squares) on a rat brain tissue section. The y-axis shows the relative intensity between the analyte and the total ion count (TIC) and the x-axis shows the time point for data acquisition. ( $n=6$  for each data point)

a)

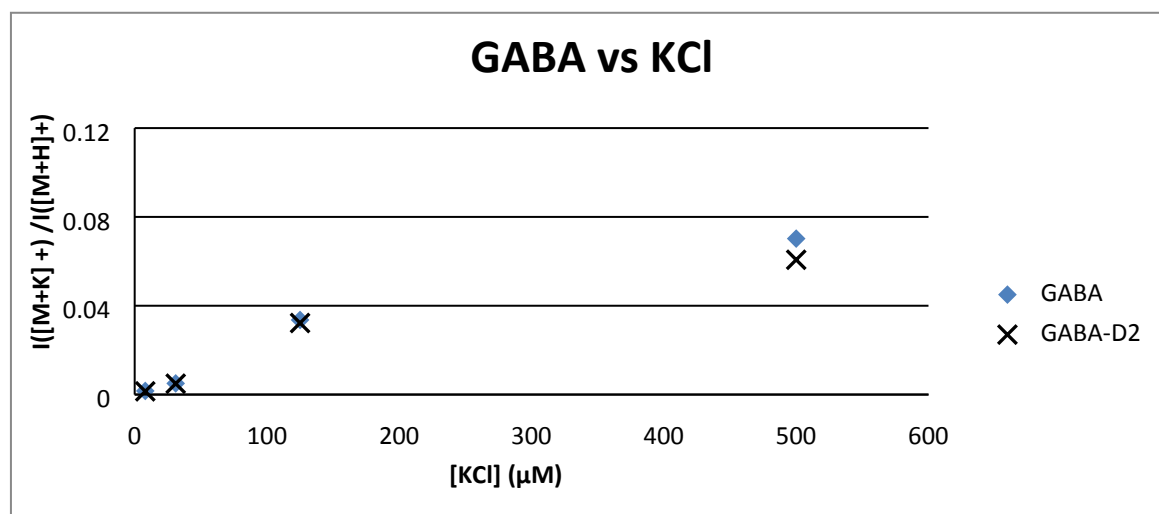

b)

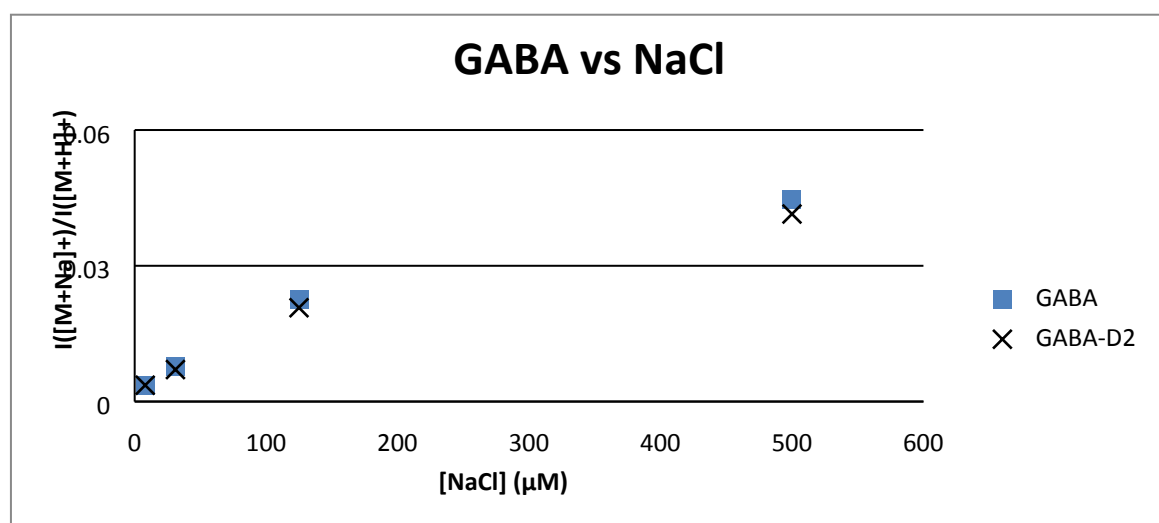

**Fig. S-4** – Change in response of GABA and its deuterated standard GABA-D2 at varying salt concentrations. a) Relative responses of  $[GABA+K]^+/ [GABA+H]^+$  (blue diamonds) and  $[GABA-D2+K]^+/ [GABA-D2+H]^+$  (black cross) at varying concentrations of KCl and b) Relative responses of  $[GABA+Na]^+/ [GABA+H]^+$  (blue diamonds) and  $[GABA-D2+Na]^+/ [GABA-D2+H]^+$  (black cross) at varying concentrations of NaCl. Data for each point was averaged over 1 min.

a)

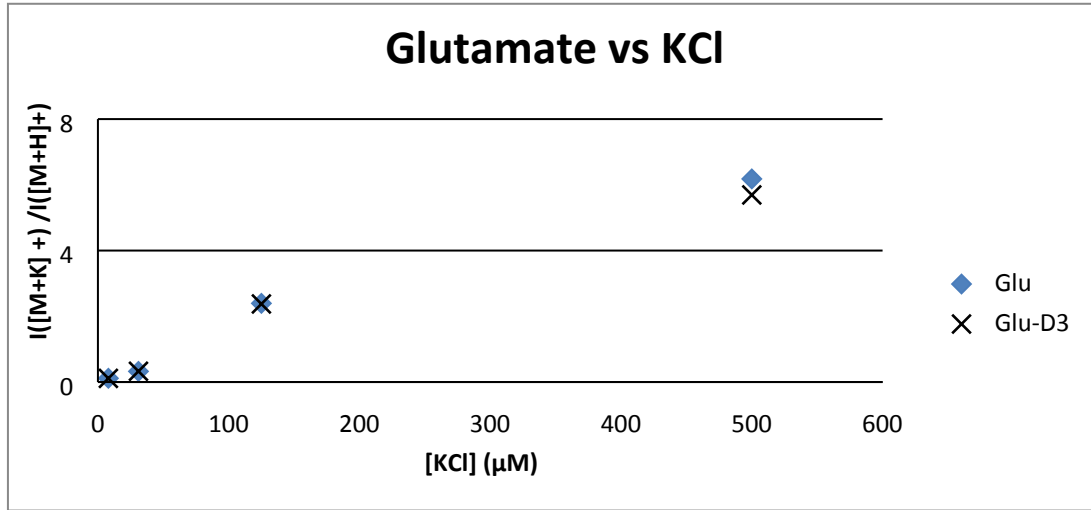

b)

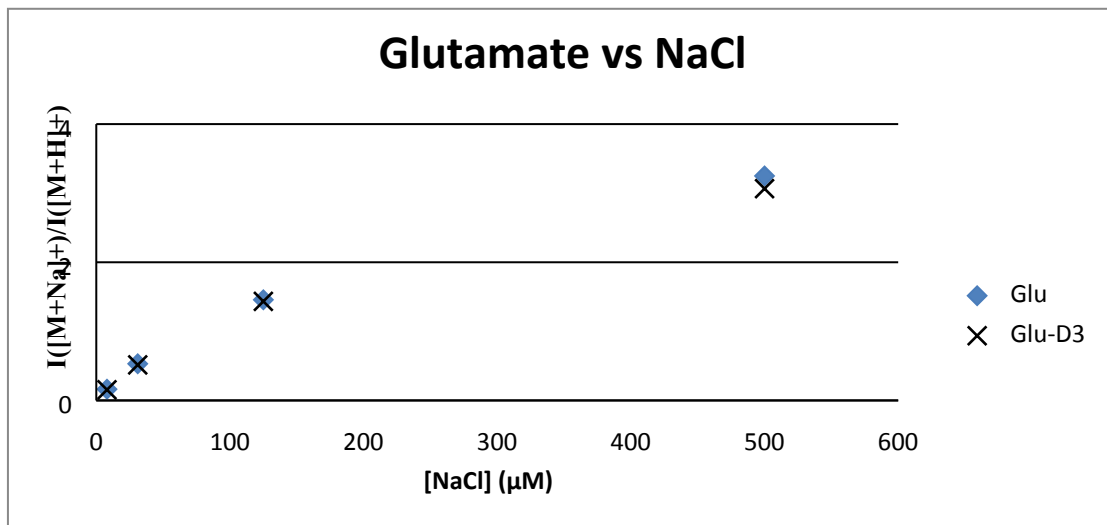

**Figure S-5** – Change in response of Glutamate and its deuterated standard Glutamate-D3 at varying salt concentrations. a) Relative responses of [Glutamate+K]<sup>+</sup>/ [Glutamate+H]<sup>+</sup> (blue diamonds) and [Glutamate-D3+K]<sup>+</sup>/ [Glutamate-D3+H]<sup>+</sup> (black cross) at varying concentrations of KCl and b) Relative responses of [Glutamate+Na]<sup>+</sup>/ [Glutamate+H]<sup>+</sup> (blue diamonds) and [Glutamate-D3+Na]<sup>+</sup>/ [Glutamate-D3+H]<sup>+</sup> (black cross) at varying concentrations of NaCl. Data for each data point was averaged over 1 min.
